# Supplementary material
Source: publisher figshare collection journal article supplement (https://gsajournals.figshare.com/ndownloader/files/28332693)
Supplement: Supplementary file 1 [file 28332693]

"#Table S1: 32 SNP haplotypes from chromosome group 4 of 8 tetraploid potato clones."
"SNP","cM","W16215.P1a","W16215.P1b","W16215.P1c","W16215.P1d","W16215.P2a","W16215.P2b","W16215.P2c","W16215.P2d","A15001.P1a","A15001.P1b","A15001.P1c","A15001.P1d","A15001.P2a","A15001.P2b","A15001.P2c","A15001.P2d","W12011.P1a","W12011.P1b","W12011.P1c","W12011.P1d","W12011.P2a","W12011.P2b","W12011.P2c","W12011.P2d","W12012.P1a","W12012.P1b","W12012.P1c","W12012.P1d","W12012.P2a","W12012.P2b","W12012.P2c","W12012.P2d"
"solcap_snp_c2_23596",0,1,1,2,1,2,2,1,1,2,1,1,1,1,2,2,1,2,2,2,2,2,2,2,2,2,2,2,1,2,2,2,2
"solcap_snp_c2_23601",0.02,2,2,2,2,2,2,2,2,2,2,2,2,2,2,2,2,2,2,2,2,2,2,1,1,2,2,2,2,2,2,1,1
"solcap_snp_c1_7567",0.47,1,1,1,1,1,1,1,1,1,1,1,1,1,1,1,1,1,1,1,1,1,1,2,2,1,1,1,1,1,1,2,2
"solcap_snp_c2_23603",0.54,1,2,2,2,2,2,2,2,2,2,2,2,1,2,2,2,2,2,2,2,2,2,2,2,2,2,2,2,2,2,2,2
"solcap_snp_c1_7571",0.92,2,2,2,2,2,2,2,2,2,2,2,2,2,2,2,2,2,2,2,2,2,2,1,1,2,2,2,2,2,2,1,1
"solcap_snp_c2_54463",2.44,2,2,2,2,2,2,2,2,2,2,2,2,2,2,2,2,2,2,2,2,2,1,2,2,2,2,1,2,2,1,2,2
"solcap_snp_c2_39322",3.16,1,1,1,1,1,1,1,1,1,1,1,1,1,1,1,1,1,1,1,1,1,2,1,1,1,1,2,1,1,2,1,1
"solcap_snp_c2_39282",3.16,1,2,1,1,1,1,2,1,1,1,2,2,1,1,1,1,1,1,1,1,1,1,1,1,1,1,1,2,1,1,1,1
"solcap_snp_c1_11626",4.6,1,1,2,1,2,1,1,1,1,1,1,1,1,2,2,1,1,1,1,1,1,1,1,1,2,1,1,1,1,1,1,1
"solcap_snp_c1_13860",5.57,2,2,2,2,1,2,2,2,2,2,2,2,2,1,1,2,2,2,2,2,2,2,2,1,1,2,2,2,2,2,2,1
"solcap_snp_c2_37633",7.26,2,1,2,2,2,2,1,2,2,2,2,2,2,2,2,2,2,2,2,2,2,2,1,2,2,2,2,2,2,2,1,2
"solcap_snp_c2_50942",7.26,1,1,2,1,2,2,1,1,2,2,2,2,1,2,2,2,2,1,1,1,2,1,1,2,2,1,1,1,2,1,1,2
"solcap_snp_c1_9084",7.26,1,1,2,1,1,1,1,1,1,1,2,2,1,1,1,1,1,1,1,1,1,1,1,1,1,1,1,1,1,1,1,1
"solcap_snp_c2_29872",9.41,2,1,2,2,2,2,1,2,2,2,2,2,2,2,2,2,2,2,2,2,2,2,1,2,2,2,2,2,2,2,1,2
"solcap_snp_c2_29851",9.41,1,2,1,1,1,1,2,1,1,1,1,1,1,1,1,2,1,1,1,1,1,1,2,1,1,1,1,1,1,1,2,1
"solcap_snp_c2_31712",9.41,2,2,2,2,2,2,2,1,2,2,2,2,2,2,2,2,2,2,2,2,2,2,2,2,2,2,2,2,2,2,2,2
"solcap_snp_c2_31713",12.01,1,1,1,1,1,1,1,1,1,1,1,1,2,1,1,1,1,1,1,2,1,1,1,1,1,2,1,1,1,1,1,1
"solcap_snp_c2_31716",12.01,2,2,1,2,2,2,2,2,2,2,2,1,2,2,2,2,2,1,2,2,2,2,2,2,2,2,2,1,2,2,2,2
"solcap_snp_c2_31717",12.01,2,1,2,1,2,2,1,2,2,2,2,2,2,2,2,1,2,2,2,1,2,2,1,2,2,2,2,2,2,2,1,2
"solcap_snp_c2_31719",12.34,2,2,2,2,2,1,2,1,1,1,2,2,2,2,2,2,1,2,2,2,1,2,2,2,2,2,2,2,1,2,2,2
"solcap_snp_c2_7751",13.33,2,2,2,2,2,2,2,2,2,2,1,2,1,2,2,2,2,2,2,2,2,1,2,2,2,1,2,2,2,1,2,2
"solcap_snp_c2_21946",13.33,2,1,2,1,2,2,2,2,2,2,2,2,2,2,2,1,2,2,2,2,2,2,2,2,2,2,2,2,2,2,2,2
"solcap_snp_c1_6898",14.13,2,2,2,2,2,2,2,2,2,2,2,2,2,2,2,2,2,2,2,2,2,1,2,2,2,2,2,2,2,1,2,2
"solcap_snp_c2_21936",14.13,1,1,2,1,2,1,2,1,1,1,2,2,2,2,2,1,1,2,2,2,1,1,2,2,2,2,2,2,1,1,2,2
"solcap_snp_c2_21934",14.13,1,2,1,2,1,2,1,2,2,2,1,1,1,1,1,2,2,1,1,1,2,1,1,1,1,1,1,1,2,1,1,1
"solcap_snp_c2_21915",14.13,1,1,1,1,1,2,1,2,2,2,1,1,1,1,1,1,2,1,1,1,1,1,1,1,1,1,1,1,1,1,1,1
"solcap_snp_c2_21896",15.33,2,1,2,1,1,1,1,1,1,1,1,2,1,1,1,1,1,2,2,1,1,1,1,1,1,1,1,2,1,1,1,1
"solcap_snp_c2_21860",15.33,2,2,2,1,2,2,2,1,2,2,2,2,2,2,2,2,2,2,2,2,2,2,2,2,2,2,2,2,2,2,2,2
"solcap_snp_c2_21842",16.77,1,2,2,2,1,2,1,2,2,2,2,2,1,1,1,2,2,2,2,2,2,2,1,1,1,1,1,2,2,2,1,1
"solcap_snp_c1_6894",16.77,1,1,2,2,1,2,2,2,2,2,1,2,1,2,1,1,2,2,2,2,1,1,2,2,2,1,2,2,1,1,2,2
"solcap_snp_c2_21858",16.77,1,1,1,1,1,2,1,2,2,2,1,1,1,1,1,1,2,1,1,1,1,1,1,1,1,1,1,1,1,1,1,1
"solcap_snp_c1_16079",18.6,1,2,1,1,2,1,1,1,1,1,1,1,1,1,2,2,1,1,1,1,2,1,1,1,1,1,1,1,2,1,1,1
"solcap_snp_c1_16080",18.94,2,2,1,1,2,2,2,2,2,2,1,1,1,2,2,2,2,1,1,2,2,2,2,2,2,2,2,1,2,2,2,2
"solcap_snp_c2_51639",20.45,2,2,2,2,2,2,2,1,2,2,2,2,2,2,2,2,2,2,2,2,2,2,2,2,1,2,2,2,2,2,2,2
"solcap_snp_c1_15106",20.45,1,1,1,1,1,1,1,1,1,1,1,1,1,1,1,1,1,1,1,1,1,2,1,1,1,1,1,1,1,2,1,1
"solcap_snp_c2_11571",20.45,2,2,2,2,2,2,2,2,2,2,2,2,2,2,2,2,2,2,2,2,2,1,2,2,2,2,2,2,2,1,2,2
"solcap_snp_c2_11564",20.45,2,2,1,1,2,2,2,2,2,2,1,1,2,2,2,2,2,2,1,2,2,2,2,2,2,2,2,1,2,2,2,2
"solcap_snp_c2_11490",22.52,1,1,1,1,1,1,1,2,1,1,1,1,1,1,1,1,1,1,2,1,1,1,2,1,2,1,1,1,1,1,2,1
"solcap_snp_c2_11489",22.52,2,2,2,2,2,2,2,1,2,2,2,2,2,2,2,2,2,2,1,2,2,2,1,2,1,2,2,2,2,2,1,2
"solcap_snp_c2_11488",22.52,2,2,1,2,2,2,2,2,2,2,2,2,1,2,2,2,2,1,2,2,2,1,2,2,2,2,2,1,2,1,2,2
"solcap_snp_c2_11425",22.52,2,2,2,1,1,2,2,2,2,2,2,2,2,2,1,2,2,2,2,2,2,2,2,2,2,2,2,2,2,2,2,2
"solcap_snp_c2_39718",24.07,2,2,2,1,1,2,2,2,2,2,2,2,2,2,1,2,2,2,2,2,2,2,2,2,2,2,2,2,2,2,2,2
"solcap_snp_c1_11723",24.88,2,2,1,2,2,2,2,2,2,2,2,2,2,2,2,2,1,2,2,2,2,2,2,2,2,1,2,1,2,2,2,2
"solcap_snp_c1_11722",24.88,2,1,2,2,2,2,1,2,1,2,2,1,1,2,2,1,2,2,2,2,1,2,2,2,2,2,1,2,1,2,2,2
"solcap_snp_c1_11709",24.88,2,1,1,2,2,1,1,1,1,1,1,1,1,1,2,1,1,1,1,1,1,1,1,1,1,1,1,1,1,1,1,1
"solcap_snp_c1_11710",24.88,2,1,1,2,2,1,1,1,1,1,1,1,1,1,2,1,1,1,1,1,1,1,1,1,1,1,1,1,1,1,1,1
"solcap_snp_c2_39593",24.88,1,1,1,2,2,1,1,1,1,1,1,1,1,1,2,1,1,1,1,1,1,1,1,1,1,1,1,1,1,1,1,1
"solcap_snp_c2_47320",26.44,1,1,2,1,1,2,1,2,1,2,1,1,1,2,1,1,2,2,2,2,1,2,1,1,2,1,1,2,1,2,1,1
"solcap_snp_c2_42863",26.44,1,1,1,2,2,1,1,1,1,1,1,1,1,1,2,1,1,1,1,1,1,1,1,1,1,1,1,1,1,1,1,1
"solcap_snp_c1_8341",26.44,2,2,2,1,1,2,2,2,2,2,2,2,2,2,1,2,2,2,2,2,2,2,2,2,2,2,2,2,2,2,2,2
"solcap_snp_c2_26771",27.94,2,1,2,2,2,2,1,2,2,2,2,1,2,2,2,1,2,2,2,2,2,2,2,2,2,2,1,2,2,2,2,2
"solcap_snp_c1_8344",27.94,2,2,2,2,2,2,2,2,2,1,2,2,2,1,2,2,2,2,2,2,2,2,2,2,2,2,2,2,2,2,2,2
"solcap_snp_c1_8347",27.96,2,1,2,2,2,2,1,2,2,2,1,1,2,2,2,1,2,2,2,2,2,1,2,2,2,2,1,2,2,1,2,2
"solcap_snp_c1_8348",27.96,1,1,1,2,2,1,1,1,1,1,1,1,1,1,2,1,1,1,1,1,1,1,1,1,1,1,1,1,1,1,1,1
"solcap_snp_c2_26793",28.45,1,2,1,1,1,1,2,1,1,1,2,2,1,1,1,2,1,1,1,1,1,2,1,1,1,1,2,1,1,2,1,1
"solcap_snp_c2_26795",28.66,2,1,2,2,2,2,1,2,2,2,1,1,2,2,2,1,2,2,2,2,2,1,2,2,2,2,1,2,2,1,2,2
"solcap_snp_c1_8354",28.96,1,1,1,1,1,1,1,1,1,2,1,1,1,2,1,1,1,1,1,1,1,1,1,1,1,1,1,1,1,1,1,1
"solcap_snp_c2_44601",31.14,1,1,1,1,1,1,1,2,1,1,1,1,2,1,1,1,2,1,2,2,1,1,2,1,2,2,1,1,1,1,2,1
"solcap_snp_c2_44620",31.14,1,2,1,1,1,1,1,1,1,1,1,2,1,1,1,2,1,2,1,1,1,1,1,1,1,1,1,1,1,1,1,1
"solcap_snp_c2_54077",33.13,2,2,2,1,1,2,2,2,2,2,2,2,2,2,1,2,2,2,2,2,2,2,1,2,2,2,2,2,2,2,1,2
"solcap_snp_c2_37325",33.13,2,1,1,2,2,1,1,1,1,2,2,1,2,2,2,1,1,1,2,2,2,2,2,1,2,2,1,1,2,2,2,1
"solcap_snp_c2_37323",33.13,2,1,1,1,1,1,1,1,1,1,2,1,2,1,1,1,1,1,2,2,2,2,1,1,2,2,1,1,2,2,1,1
"solcap_snp_c2_51559",33.13,2,1,2,2,2,2,1,1,2,2,2,1,2,2,2,1,2,1,2,2,2,2,2,2,2,2,2,2,2,2,2,2
"solcap_snp_c2_51567",34.11,2,2,1,2,2,1,2,2,1,2,2,2,2,2,2,2,1,2,2,2,2,2,2,1,2,2,1,1,2,2,2,1
"solcap_snp_c1_16299",34.11,2,2,2,2,2,2,2,2,2,1,2,2,2,1,2,2,2,2,2,2,2,2,2,2,2,2,2,2,2,2,2,2
"solcap_snp_c2_56250",34.11,2,2,2,2,2,2,2,2,2,1,2,2,2,1,2,2,2,2,2,2,2,2,2,2,2,2,2,2,2,2,2,2
"solcap_snp_c2_29468",34.11,1,2,1,1,1,1,2,2,1,1,1,1,1,1,1,2,1,2,1,1,1,1,1,1,1,1,1,1,1,1,1,1
"solcap_snp_c2_29469",35.5,1,1,1,2,2,1,1,1,1,1,1,1,1,1,2,1,1,1,1,1,1,1,1,1,1,1,1,1,1,1,1,1
"solcap_snp_c1_8983",36.21,1,1,2,1,1,2,1,1,2,2,1,1,2,2,1,1,2,1,1,2,1,1,1,2,2,1,2,2,1,1,1,2
"solcap_snp_c2_14930",36.21,1,1,1,2,2,1,1,1,1,1,1,1,1,1,2,1,1,1,1,1,1,1,1,1,1,1,1,1,1,1,1,1
"solcap_snp_c1_16263",36.21,1,2,2,2,2,2,2,2,2,2,2,2,2,2,2,2,2,2,1,2,1,2,2,2,2,1,2,2,1,2,2,2
"solcap_snp_c1_16261",36.21,2,2,2,1,1,2,2,2,2,2,2,2,2,2,1,2,2,2,2,2,2,2,2,2,2,2,2,2,2,2,2,2
"solcap_snp_c1_11406",36.21,1,1,1,2,2,1,1,1,1,1,1,1,1,1,2,1,1,1,1,1,1,1,1,1,1,1,1,1,1,1,1,1
"solcap_snp_c2_38246",36.21,2,1,2,2,2,2,1,1,2,2,2,2,2,2,2,1,2,1,2,2,2,2,2,2,2,2,2,2,2,2,2,2
"solcap_snp_c2_18225",37.65,2,2,2,1,1,2,2,2,2,2,1,2,2,2,1,2,2,2,2,2,2,1,1,2,2,2,2,2,2,1,1,2
"solcap_snp_c2_39962",38.75,2,1,2,1,1,2,1,1,2,2,1,1,2,2,1,1,2,1,2,2,2,1,1,2,2,2,2,2,2,1,1,2
"solcap_snp_c2_36810",39.7,1,1,1,2,2,1,1,1,1,1,2,2,1,1,2,1,1,1,1,1,1,2,2,1,1,1,1,1,1,2,2,1
"solcap_snp_c2_31359",40.78,2,1,1,2,2,1,2,1,1,1,1,1,1,1,2,1,1,1,2,1,2,1,1,1,1,2,1,1,2,1,1,1
"solcap_snp_c2_11104",44.28,1,1,1,1,1,1,1,1,1,1,1,1,1,1,1,1,1,1,1,1,1,1,1,1,2,1,1,1,1,1,1,1
"solcap_snp_c2_10460",44.28,2,1,1,2,2,1,2,1,1,2,2,2,1,2,2,1,2,2,2,1,2,2,2,1,2,2,2,1,2,2,2,1
"solcap_snp_c1_3445",44.28,2,2,2,2,2,2,2,1,2,2,1,1,2,2,2,1,2,2,2,2,2,1,1,2,2,2,2,2,2,1,1,2
"solcap_snp_c2_10449",44.28,2,1,1,2,2,1,2,2,1,1,2,2,1,1,2,2,1,1,2,1,2,2,2,1,2,2,1,1,2,2,2,1
"solcap_snp_c1_3443",44.28,1,1,1,1,1,1,1,1,1,2,1,1,1,2,1,1,2,2,1,1,1,1,1,1,1,1,2,1,1,1,1,1
"solcap_snp_c2_10446",44.28,2,2,2,2,2,2,2,2,2,1,2,2,2,1,2,2,1,1,2,2,2,2,2,2,2,2,1,2,2,2,2,2
"solcap_snp_c2_10443",44.71,2,1,1,2,2,1,2,2,1,1,1,1,1,1,2,2,1,1,2,1,2,1,2,1,2,2,1,1,2,1,2,1
"solcap_snp_c2_57338",44.73,2,1,1,2,2,1,2,1,1,1,1,1,1,1,2,1,1,1,2,1,2,1,1,1,2,2,1,1,2,1,1,1
"solcap_snp_c2_43221",49.91,2,2,2,1,1,2,2,2,2,2,2,2,2,2,1,2,2,2,2,2,2,2,2,2,2,2,2,2,2,2,2,2
"solcap_snp_c2_43223",49.91,1,1,2,2,2,2,2,2,2,1,2,2,2,1,2,2,1,1,1,2,2,2,2,2,2,2,1,2,2,2,2,2
"solcap_snp_c2_43227",49.91,2,1,2,2,2,2,2,2,2,1,2,2,2,1,2,2,1,2,2,2,2,1,2,2,2,2,1,2,2,1,2,2
"solcap_snp_c2_43230",49.91,1,2,1,1,1,1,2,1,1,2,1,1,1,2,1,1,2,1,1,1,1,1,1,1,1,2,2,1,1,1,1,1
"solcap_snp_c2_54605",51.47,1,1,1,2,2,1,1,1,1,1,1,1,1,1,2,1,1,1,1,1,1,1,1,1,1,1,1,1,1,1,1,1
"solcap_snp_c1_3310",51.47,2,1,1,2,2,1,2,1,1,1,1,1,1,1,2,2,1,2,2,1,2,1,1,1,1,2,1,1,2,1,1,1
"solcap_snp_c2_10007",51.9,1,1,1,2,2,1,1,1,1,1,1,1,1,1,2,1,1,1,1,1,2,1,1,1,1,1,1,1,2,1,1,1
"solcap_snp_c1_15603",52.39,1,2,2,2,2,2,2,2,2,2,1,1,2,2,2,1,2,2,1,2,2,1,1,2,2,2,2,2,2,1,1,2
"solcap_snp_c2_53509",52.75,2,2,2,2,2,2,2,2,2,2,2,2,2,2,2,2,2,2,2,2,2,2,2,2,1,2,2,2,2,2,2,2
"solcap_snp_c1_3319",52.75,2,2,2,1,1,2,1,2,2,2,1,1,2,2,1,2,2,1,2,2,1,1,1,2,2,1,2,2,1,1,1,2
"solcap_snp_c2_10025",52.75,1,1,1,2,2,1,2,1,1,1,2,2,1,1,2,1,1,1,1,1,2,2,2,1,1,2,1,1,2,2,2,1
"solcap_snp_c2_10020",52.75,1,1,1,2,2,1,2,1,1,1,1,1,1,1,2,1,1,1,1,1,2,1,1,1,1,2,1,1,2,1,1,1
"solcap_snp_c1_3317",52.75,2,2,2,2,2,2,2,2,2,2,2,2,2,2,2,2,2,1,2,2,2,2,2,2,2,2,2,2,2,2,2,2
"solcap_snp_c1_5420",55.11,2,2,1,2,2,1,2,1,1,2,1,1,1,2,2,1,2,2,2,1,1,2,2,1,1,2,2,1,1,2,2,1
"solcap_snp_c2_16712",55.11,2,1,2,1,1,2,1,2,2,1,2,2,2,1,1,2,1,2,2,2,2,1,1,2,2,1,1,2,2,1,1,2
"solcap_snp_c2_16731",55.11,2,2,2,2,2,2,2,2,2,2,2,2,2,2,2,2,2,1,2,2,2,2,2,2,2,2,2,2,2,2,2,2
"solcap_snp_c2_16744",56.99,2,2,1,2,2,1,2,1,1,2,1,1,2,2,2,1,2,2,2,1,1,2,2,1,1,2,2,1,1,2,2,1
"solcap_snp_c2_48814",57.77,2,1,2,2,2,2,2,2,2,1,2,2,1,1,1,2,1,2,2,2,2,2,2,1,2,2,1,1,2,2,2,1
"solcap_snp_c2_48818",57.87,1,2,1,1,1,1,1,1,1,2,1,1,2,2,2,1,2,1,1,1,1,1,1,2,2,1,2,2,1,1,1,2
"solcap_snp_c2_39852",59.21,2,2,2,2,2,2,2,2,2,2,2,2,2,2,2,2,2,2,2,2,2,2,2,2,1,2,2,2,2,2,2,2
"solcap_snp_c2_39856",59.21,2,2,2,2,2,2,2,1,2,2,1,1,2,2,2,2,2,2,2,2,2,2,2,2,2,2,2,2,2,2,2,2
"solcap_snp_c2_39848",59.21,1,1,2,2,1,2,1,2,2,1,2,2,1,1,1,1,1,1,1,1,2,1,2,1,1,1,1,1,2,1,2,1
"solcap_snp_c1_6033",59.21,2,2,1,2,2,1,2,2,1,2,2,2,2,2,2,2,2,2,2,2,1,2,2,2,2,2,2,2,1,2,2,2
"solcap_snp_c1_6036",59.25,1,1,2,1,1,2,2,1,2,1,1,1,1,1,1,1,1,2,1,1,2,1,2,1,2,2,1,1,2,1,2,1
"solcap_snp_c1_6037",59.85,2,2,1,2,2,1,2,2,1,2,2,2,2,2,2,2,2,2,2,2,1,2,2,2,2,2,2,2,1,2,2,2
"solcap_snp_c1_6040",60.09,1,1,1,1,1,1,2,1,1,1,1,1,1,1,1,1,1,2,1,1,1,1,1,1,2,2,1,1,1,1,1,1
"solcap_snp_c2_54533",60.62,2,1,2,1,2,2,1,1,2,1,1,1,1,1,1,1,1,1,2,1,2,2,1,1,2,1,1,1,2,2,1,1
"solcap_snp_c1_15760",60.97,2,1,2,2,2,2,1,2,2,2,2,2,1,2,1,1,1,1,2,2,2,2,2,2,2,1,2,2,2,2,2,2
"solcap_snp_c2_56238",60.97,2,2,2,2,2,2,2,2,2,2,2,2,2,1,2,2,2,2,2,2,2,2,2,1,1,2,2,1,2,2,2,1
"solcap_snp_c2_1508",60.97,1,1,1,1,1,1,1,1,1,1,1,1,1,2,1,1,1,1,1,1,1,1,2,2,2,1,1,2,1,1,2,2
"solcap_snp_c2_48692",62.51,2,2,1,2,2,1,2,1,1,2,1,1,2,2,2,1,2,2,2,2,1,2,1,2,2,2,2,2,1,2,1,2
"solcap_snp_c2_48693",62.65,1,1,2,1,1,2,1,2,2,1,2,2,1,1,1,2,1,1,1,1,2,1,1,1,1,1,1,1,2,1,1,1
"solcap_snp_c1_14397",62.91,1,1,2,1,1,2,1,2,2,1,2,2,2,2,1,2,1,1,1,2,2,1,2,2,1,1,2,2,2,1,2,2
"solcap_snp_c2_45034",63.91,2,2,2,2,2,2,1,2,2,1,2,2,1,2,2,2,1,1,2,1,2,2,2,2,2,1,1,2,2,2,2,2
"solcap_snp_c2_45040",63.91,1,1,1,1,1,1,1,1,1,1,1,1,1,2,1,1,1,1,1,1,1,1,2,2,1,1,1,2,1,1,2,2
"solcap_snp_c1_15513",63.91,2,2,2,1,1,2,2,2,2,2,2,2,2,2,2,2,2,2,1,2,2,2,2,2,2,2,2,2,2,2,2,2
"solcap_snp_c1_15983",65.04,1,2,1,2,2,1,1,1,1,1,2,2,2,1,2,2,1,2,2,2,2,1,2,1,1,1,2,1,2,1,2,1
"solcap_snp_c1_15982",65.04,1,1,1,2,2,1,1,1,1,1,1,1,1,1,1,1,1,1,2,1,1,1,1,1,1,1,1,1,1,1,1,1
"solcap_snp_c1_15977",66.27,2,1,2,1,1,2,2,2,2,2,2,2,2,2,1,2,2,1,1,2,2,2,2,2,1,2,2,2,2,2,2,2
"solcap_snp_c2_54888",67.24,2,2,2,2,2,2,2,2,2,2,2,2,2,2,2,2,2,2,2,2,2,2,2,2,1,2,2,2,2,2,2,2
"solcap_snp_c2_54887",67.24,2,1,1,1,1,1,1,1,1,1,1,2,1,2,1,2,1,1,1,1,2,1,1,2,1,1,1,2,2,1,1,2
"solcap_snp_c1_14440",67.78,2,2,2,2,2,1,1,1,2,1,2,2,2,2,2,2,1,2,2,2,2,2,2,2,2,1,2,2,2,2,2,2
"solcap_snp_c1_14435",67.92,2,2,2,2,2,1,1,1,2,1,1,2,1,2,2,2,1,2,2,1,2,2,1,2,2,1,1,2,2,2,1,2
"solcap_snp_c2_48810",68.31,1,1,2,2,2,1,1,1,2,1,1,2,1,1,1,2,1,1,2,1,2,1,1,1,1,1,1,1,2,1,1,1
"solcap_snp_c2_57883",71.23,2,2,1,2,2,1,1,1,1,1,2,2,2,1,2,1,1,2,2,2,1,2,2,2,2,1,2,2,1,2,2,2
"solcap_snp_c1_16625",71.63,1,1,1,1,2,1,1,1,1,1,1,1,1,1,1,1,1,1,1,1,2,1,1,1,1,1,1,1,2,1,1,1
"solcap_snp_c2_52866",72.55,2,1,2,1,2,2,2,2,2,2,1,1,1,2,1,2,1,1,1,1,2,1,1,1,1,2,1,1,2,1,1,1
"solcap_snp_c2_43999",72.55,2,2,2,2,2,2,2,2,2,2,2,2,2,2,2,2,2,2,2,2,2,2,2,1,1,2,2,1,2,2,2,1
"solcap_snp_c1_10441",72.55,2,2,2,2,2,2,2,2,2,2,2,2,2,2,2,2,2,2,2,2,1,2,2,1,2,2,2,1,1,2,2,1
"solcap_snp_c2_34958",74.49,1,2,1,2,2,1,1,1,1,1,1,2,1,1,2,1,2,2,2,1,2,1,2,2,1,1,2,2,2,1,2,2
"solcap_snp_c2_54335",74.49,2,1,1,1,1,2,2,2,1,2,2,1,2,1,1,1,1,1,1,2,1,1,1,1,2,2,1,1,1,1,1,1
"solcap_snp_c2_36021",74.49,2,2,2,2,2,2,2,2,2,2,2,2,2,2,2,2,1,2,2,2,2,1,2,2,2,2,2,2,2,1,2,2
"solcap_snp_c2_36027",76.28,2,1,2,2,1,2,2,2,2,2,2,2,2,2,2,2,2,2,2,2,2,2,2,2,2,2,2,2,2,2,2,2
"solcap_snp_c1_10750",76.28,2,2,2,1,2,2,2,2,2,2,2,1,2,2,1,1,2,1,1,2,2,2,2,1,2,2,1,1,2,2,2,1
"solcap_snp_c1_10751",76.28,1,2,2,2,2,1,1,1,2,1,1,2,1,2,2,2,2,2,2,1,2,2,2,2,1,1,2,2,2,2,2,2
"solcap_snp_c2_36031",76.29,1,2,1,2,2,1,1,1,1,1,1,2,1,1,2,2,2,2,2,1,2,2,2,2,1,1,2,2,2,2,2,2
"solcap_snp_c2_36033",76.29,2,1,2,1,1,2,2,2,2,2,2,1,2,2,1,1,2,1,1,2,1,2,2,1,2,2,1,1,1,2,2,1
"solcap_snp_c2_36059",77.81,2,2,1,2,2,2,2,2,1,2,2,2,2,1,2,2,2,2,2,2,2,2,2,2,2,2,2,2,2,2,2,2
"solcap_snp_c2_55849",77.81,1,2,1,1,2,1,1,1,1,1,2,1,2,1,2,2,2,2,1,2,1,1,1,2,1,1,1,2,1,1,1,2
"solcap_snp_c2_39810",77.81,1,1,2,1,1,1,1,1,2,1,1,1,1,2,1,1,1,1,1,1,1,2,2,1,1,1,1,1,1,2,2,1
"solcap_snp_c1_11750",77.81,2,2,2,2,2,2,2,2,2,1,2,1,2,2,2,2,2,2,1,2,1,2,2,2,2,2,1,2,1,2,2,2
"solcap_snp_c2_39816",78.5,2,2,2,2,2,2,2,2,2,2,2,2,2,2,2,2,1,2,2,2,2,1,2,2,2,2,2,2,2,1,2,2
"solcap_snp_c1_11758",78.65,1,1,1,1,1,1,1,1,1,1,1,1,1,1,1,1,2,1,1,1,1,2,2,1,1,1,1,1,1,2,2,1
"solcap_snp_c2_51244",78.65,2,1,2,2,1,2,2,2,2,2,2,2,2,1,2,2,1,2,2,2,2,2,2,2,2,2,2,2,2,2,2,2
"solcap_snp_c2_51234",81.17,2,1,2,2,1,2,2,2,2,2,2,2,2,1,2,2,2,2,2,2,2,2,2,2,2,2,2,2,2,2,2,2
"solcap_snp_c2_53111",81.17,2,2,2,2,2,2,2,2,2,2,2,2,2,2,2,2,2,2,2,2,2,2,1,2,2,2,2,2,2,2,1,2
"solcap_snp_c1_11360",81.73,2,1,2,2,1,2,2,2,2,1,2,2,2,1,2,1,1,2,2,2,2,2,2,1,2,2,2,1,2,2,2,1
"solcap_snp_c1_11352",82.93,2,2,2,2,2,2,2,2,2,1,2,2,2,2,1,1,2,1,2,2,2,2,2,1,1,2,2,1,2,2,2,1
"solcap_snp_c2_48290",83.26,1,2,1,1,2,1,1,1,1,1,1,1,1,2,1,1,1,1,1,1,1,2,1,1,1,1,1,1,1,2,1,1
"solcap_snp_c1_11206",84.04,1,2,2,2,2,1,1,1,2,2,2,1,1,2,2,2,2,2,2,1,2,2,2,2,2,1,1,2,2,2,2,2
"solcap_snp_c1_9771",84.89,1,1,1,1,1,1,1,1,1,1,1,1,1,1,1,1,1,1,1,1,1,1,1,1,1,2,1,1,1,1,1,1
"solcap_snp_c2_32601",84.89,1,1,1,1,1,1,1,1,1,1,1,1,1,1,1,1,2,1,1,1,1,2,1,1,1,1,2,1,1,2,1,1
"solcap_snp_c2_32543",84.89,2,2,2,2,2,1,2,1,2,2,2,1,2,2,2,2,2,2,2,1,2,2,1,2,2,1,2,2,2,2,1,2
"solcap_snp_c1_11670",84.89,1,1,1,2,1,2,1,2,1,2,2,2,2,1,2,2,1,2,2,2,2,2,2,2,2,2,2,2,2,2,2,2
"solcap_snp_c2_39439",84.89,2,2,2,2,2,2,2,2,2,2,2,2,2,2,2,2,2,2,2,1,2,2,2,2,2,2,2,2,2,2,2,2
"solcap_snp_c2_39443",88.18,2,2,2,2,2,2,2,2,2,2,2,2,2,2,1,2,2,2,2,2,2,2,2,2,1,1,2,2,2,2,2,2
"solcap_snp_c2_39447",88.18,1,1,1,2,1,2,1,2,1,1,1,2,1,1,1,1,1,1,2,1,1,1,1,1,1,1,1,1,1,1,1,1
"solcap_snp_c2_39450",88.18,1,1,1,1,1,1,1,1,1,1,1,1,1,1,1,2,1,1,1,2,1,1,2,2,1,1,1,2,1,1,2,2
"solcap_snp_c2_39453",88.63,1,1,1,2,1,2,1,2,1,1,1,2,1,1,1,1,1,1,2,1,1,1,2,1,1,1,1,1,1,1,2,1
"solcap_snp_c1_12877",88.63,2,2,2,2,2,2,2,2,2,2,2,2,2,2,2,1,2,2,2,2,2,1,2,1,2,2,1,1,2,1,2,1
"solcap_snp_c2_43748",89.11,1,1,1,2,1,2,1,2,1,2,2,2,2,1,2,2,1,2,2,2,2,2,2,2,2,2,2,2,2,2,2,2
"solcap_snp_c1_11639",89.27,1,1,1,2,1,1,1,2,1,1,1,2,1,1,1,1,1,1,2,1,1,1,1,1,1,1,1,1,1,1,1,1
"solcap_snp_c2_39343",89.41,1,1,1,1,1,1,1,1,1,1,1,1,1,1,1,2,1,1,1,1,1,2,1,2,1,1,2,2,1,2,1,2
"solcap_snp_c2_42685",91.26,1,1,2,2,1,2,2,2,2,2,1,2,2,1,2,1,1,2,2,1,2,1,1,1,2,2,1,1,2,1,1,1
"solcap_snp_c2_21590",91.6,1,2,2,1,2,2,2,1,2,2,2,1,2,2,2,2,2,2,1,2,2,2,2,2,2,2,2,2,2,2,2,2
"solcap_snp_c2_21579",91.76,1,1,1,1,1,1,1,1,1,1,1,1,1,2,1,1,2,1,1,1,1,1,1,1,1,1,1,2,1,1,1,1
"solcap_snp_c2_21578",91.82,2,2,2,2,2,2,2,2,2,2,2,2,2,1,2,1,1,2,2,1,2,1,2,1,2,2,1,1,2,1,2,1
"solcap_snp_c2_21573",92.49,2,2,2,2,2,2,2,2,2,2,2,2,2,1,2,2,1,2,2,2,2,2,2,2,2,2,2,1,2,2,2,2
"solcap_snp_c1_6758",94.08,1,1,1,1,1,1,1,1,1,1,1,2,1,1,1,1,1,1,1,1,1,1,1,1,1,1,1,2,1,1,1,1
"solcap_snp_c1_6750",94.08,2,1,2,1,1,2,2,2,2,2,1,2,2,2,2,2,2,2,2,2,2,2,1,2,2,2,2,2,2,2,1,2
"solcap_snp_c1_6749",94.08,2,1,1,2,1,1,1,1,1,1,1,2,1,1,1,1,1,1,2,1,1,1,1,1,1,1,1,2,1,1,1,1
"solcap_snp_c1_6748",94.08,1,1,1,1,1,1,1,1,1,1,1,2,1,2,1,1,2,1,1,2,1,2,1,2,1,1,2,2,1,2,1,2
"solcap_snp_c2_21479",95.59,2,2,2,2,2,2,2,2,2,2,2,1,2,2,2,2,2,2,2,2,2,2,2,2,2,2,2,1,2,2,2,2
"solcap_snp_c2_21367",95.59,2,1,2,2,1,2,2,2,2,2,1,2,2,2,2,2,2,2,2,2,2,2,1,2,2,2,2,2,2,2,1,2
"solcap_snp_c1_8328",97.24,1,1,2,1,1,2,2,1,2,1,1,1,1,1,2,2,1,1,1,1,1,1,1,1,2,2,1,1,1,1,1,1
"solcap_snp_c2_26662",97.24,1,1,1,1,1,1,1,1,1,1,1,2,2,1,1,1,1,1,1,1,1,1,1,1,1,1,1,2,1,1,1,1
"solcap_snp_c2_26675",97.24,2,1,2,1,1,2,2,2,2,2,1,1,1,1,2,2,1,2,2,2,2,2,1,1,2,2,2,1,2,2,1,1
"solcap_snp_c1_8316",97.24,2,2,2,1,2,2,2,2,2,2,2,1,1,1,2,2,1,2,2,2,2,2,2,1,2,2,2,1,2,2,2,1
"solcap_snp_c1_7990",98.16,1,2,1,2,2,1,1,2,1,2,2,2,2,2,1,1,2,2,1,2,2,2,2,2,1,1,2,2,2,2,2,2
"solcap_snp_c2_55796",99.38,1,2,1,1,2,1,1,2,1,2,2,1,1,2,1,1,2,1,1,2,1,1,2,2,1,1,1,1,1,1,2,2
"solcap_snp_c2_55788",101.21,2,1,2,2,1,2,2,2,2,2,1,2,2,2,2,2,1,2,2,2,2,2,1,1,2,2,2,2,2,2,1,1
"solcap_snp_c2_55781",101.21,2,2,2,2,2,2,2,2,2,2,2,1,1,2,2,2,2,2,2,2,2,1,2,2,2,2,2,1,2,1,2,2
"solcap_snp_c2_55779",101.45,1,1,1,1,1,1,1,1,1,1,1,2,2,1,1,1,1,1,1,1,1,2,1,1,1,1,1,2,1,2,1,1
"solcap_snp_c2_26713",101.61,2,2,2,2,2,2,2,2,2,2,2,2,2,2,2,2,2,1,2,2,2,1,2,2,2,2,1,2,2,1,2,2
"solcap_snp_c1_8330",103.61,1,1,1,1,1,1,1,1,1,2,1,2,2,1,1,1,1,2,1,2,2,2,1,1,1,1,2,2,2,2,1,1
"solcap_snp_c2_26741",104.77,1,2,2,2,2,2,2,2,2,2,2,1,1,2,2,2,2,2,1,2,1,2,2,2,2,2,2,1,1,2,2,2
"solcap_snp_c2_26744",105.95,2,1,1,1,1,1,1,1,1,1,1,1,1,2,1,1,2,1,2,1,1,1,1,2,1,1,1,1,1,1,1,2
"solcap_snp_c2_44640",108.15,2,2,2,2,2,1,2,2,2,2,2,2,2,2,1,2,2,2,2,2,2,2,2,2,1,2,2,2,2,2,2,2
"solcap_snp_c1_13172",108.15,2,2,1,1,2,2,1,2,1,2,2,2,2,1,2,2,1,2,2,2,2,2,2,1,2,1,2,2,2,2,2,1
"solcap_snp_c2_32056",108.15,2,2,1,1,2,2,1,2,2,2,2,2,2,2,2,2,2,2,2,2,2,2,2,2,2,2,2,2,2,2,2,2
"solcap_snp_c2_32042",108.17,1,1,2,1,1,1,2,1,1,1,1,1,1,1,1,1,1,1,1,1,1,1,1,1,1,1,1,1,1,1,1,1
"solcap_snp_c2_32019",109.31,2,2,1,1,2,2,1,2,1,2,2,2,2,1,2,2,1,2,2,2,2,1,2,1,2,1,2,2,2,1,2,1
"solcap_snp_c2_54446",110.9,2,1,1,2,1,1,1,1,1,1,1,1,1,2,1,1,2,1,2,1,1,1,1,2,1,2,1,1,1,1,1,2
"solcap_snp_c2_52205",112.18,1,1,2,2,1,1,2,1,2,1,1,1,1,1,1,1,1,1,1,1,1,1,1,1,1,1,1,1,1,1,1,1
"solcap_snp_c2_52203",112.18,2,2,2,2,1,2,2,1,2,2,1,1,1,2,2,1,2,1,2,2,1,2,1,2,2,2,1,1,1,2,1,2
"solcap_snp_c2_52196",112.18,1,1,1,1,2,1,1,2,1,1,2,2,2,1,1,2,1,2,1,1,2,1,2,1,1,1,2,2,2,1,2,1
"solcap_snp_c2_52195",112.37,2,2,2,1,2,2,2,2,2,2,2,2,2,1,2,2,1,2,2,2,2,2,2,1,2,1,2,2,2,2,2,1
"solcap_snp_c2_34913",113.41,1,2,1,1,1,2,1,1,1,2,1,2,1,1,1,1,1,2,1,2,2,2,1,1,1,2,1,1,2,2,1,1
"solcap_snp_c2_34890",115.12,1,1,2,1,1,1,2,1,2,1,1,1,1,1,1,1,1,1,1,1,1,1,1,1,1,1,1,1,1,1,1,1
"solcap_snp_c2_34876",115.12,1,2,1,2,1,2,1,1,1,1,1,1,1,2,2,1,1,1,1,2,1,1,1,1,2,2,1,1,1,1,1,1
"solcap_snp_c2_34874",115.12,2,1,2,2,2,1,2,2,2,2,2,2,2,2,2,2,2,2,2,2,2,2,2,2,2,1,2,2,2,2,2,2
"solcap_snp_c2_34868",115.99,2,2,2,2,1,2,2,1,2,2,1,2,1,2,2,1,2,2,2,2,2,2,1,2,2,2,1,1,2,2,1,2
"solcap_snp_c2_44461",119.12,1,2,1,1,1,1,1,1,1,1,1,1,1,1,1,1,1,1,1,1,1,1,1,1,1,2,1,1,1,1,1,1
"solcap_snp_c1_13085",119.12,1,2,2,2,1,2,2,1,2,2,1,2,1,2,2,1,2,1,1,1,2,2,1,2,2,2,1,1,2,2,1,2
"solcap_snp_c1_13077",119.12,1,2,2,1,1,1,2,1,1,1,1,1,1,1,1,1,2,1,1,1,1,1,1,2,1,2,1,1,1,1,1,2
"solcap_snp_c1_13079",120.39,2,2,1,2,2,2,1,2,2,2,2,2,2,2,2,2,2,2,2,2,2,2,2,2,2,2,2,2,2,2,2,2
"solcap_snp_c2_12976",120.39,1,2,2,2,1,2,2,1,2,2,1,1,1,2,2,1,2,1,1,2,1,2,1,2,2,2,1,1,1,2,1,2
"solcap_snp_c1_4178",120.76,2,1,2,2,2,2,2,2,2,2,2,2,2,2,2,2,1,2,2,2,2,2,2,1,2,1,2,2,2,2,2,1
"solcap_snp_c2_12959",121.34,2,2,2,1,1,2,2,1,1,1,1,2,1,1,1,1,2,2,2,1,2,2,1,2,1,2,1,1,2,2,1,2
"solcap_snp_c2_12954",121.9,1,2,1,1,1,1,1,1,1,1,1,1,1,1,1,1,2,1,1,1,1,1,1,2,1,2,1,1,1,1,1,2
"solcap_snp_c1_4171",123.59,1,2,2,2,1,2,2,1,2,2,1,2,1,2,2,1,2,2,1,1,2,2,1,2,2,2,1,1,2,2,1,2
"solcap_snp_c2_12921",124.03,2,1,2,1,2,2,2,2,1,2,2,2,2,1,1,2,1,2,2,2,2,2,2,1,1,1,2,2,2,2,2,1
"solcap_snp_c2_12913",124.42,1,2,2,2,1,2,2,1,2,2,1,2,1,2,2,1,2,2,1,1,2,1,1,2,2,2,1,1,2,1,1,2
"solcap_snp_c1_4162",125.18,2,1,2,2,2,2,2,2,2,2,2,2,2,2,2,2,1,2,2,2,2,2,2,1,2,1,2,2,2,2,2,1
"solcap_snp_c1_4140",125.18,2,1,1,1,2,1,1,2,1,2,2,2,2,1,1,2,1,2,2,2,2,1,2,1,1,1,2,2,2,1,2,1
"solcap_snp_c1_4109",127.1,2,2,2,1,2,2,2,2,2,2,2,2,2,2,2,2,1,2,2,2,2,2,2,2,2,1,2,2,2,2,2,2
"solcap_snp_c1_10211",127.61,1,1,1,2,1,1,1,1,1,1,1,1,1,1,1,1,2,1,1,1,1,1,1,1,1,2,1,1,1,1,1,1
"solcap_snp_c1_10179",127.61,1,1,2,2,1,1,2,1,2,2,1,1,1,2,2,1,2,1,1,1,1,1,1,1,2,2,1,1,1,1,1,1
"solcap_snp_c2_34050",128.33,2,2,2,2,1,2,2,1,2,2,1,2,1,2,2,1,2,2,2,2,2,2,1,2,2,2,1,1,2,2,1,2
"solcap_snp_c2_35970",130.08,1,2,2,1,1,2,2,1,1,2,1,2,1,2,2,1,2,2,1,1,2,2,1,2,2,1,1,1,2,2,1,2
"solcap_snp_c1_10679",132.05,1,1,1,1,1,1,1,1,1,1,1,1,1,1,1,1,2,1,1,1,1,1,1,1,1,1,1,1,1,1,1,1
"solcap_snp_c1_10670",132.05,2,2,2,2,2,1,2,2,2,1,2,2,2,2,2,2,2,2,2,2,1,2,2,2,2,2,2,2,1,2,2,2
"solcap_snp_c1_10668",132.05,1,1,1,1,1,2,1,1,1,2,1,1,1,1,1,1,1,1,1,1,2,1,1,1,1,1,1,1,2,1,1,1
"solcap_snp_c1_3450",132.46,1,1,1,1,1,1,1,2,1,1,1,1,2,1,1,1,1,1,1,1,1,1,1,1,1,1,1,1,1,1,1,1
"solcap_snp_c2_10870",134.97,2,2,2,2,2,2,2,2,2,2,2,2,2,2,2,2,2,2,2,1,2,2,2,2,2,2,2,2,2,2,2,2
"solcap_snp_c2_10867",134.97,2,1,1,1,2,2,1,1,1,1,2,1,1,1,1,2,2,2,2,1,1,1,2,1,1,2,2,2,1,1,2,1
"solcap_snp_c2_10832",134.97,1,1,1,1,1,1,1,2,1,1,1,1,2,1,1,1,1,1,1,1,1,1,1,1,1,1,1,1,1,1,1,1
"solcap_snp_c2_10828",135.7,2,2,2,1,2,1,2,2,2,2,2,2,2,2,2,2,1,2,2,2,1,2,2,2,2,2,2,1,1,2,2,2
"solcap_snp_c2_10819",136.03,2,2,2,2,2,1,2,2,2,2,2,2,2,2,2,2,1,2,2,2,2,2,2,2,2,2,2,1,2,2,2,2
"solcap_snp_c2_10802",138.08,1,1,1,1,1,1,1,1,1,1,1,1,1,1,1,1,2,1,1,1,2,1,1,1,1,1,1,2,2,1,1,1
"solcap_snp_c1_3545",138.08,1,2,2,2,1,2,2,2,2,2,1,2,2,2,2,1,1,1,1,2,1,2,1,2,2,1,1,1,1,2,1,2
"solcap_snp_c1_3544",138.17,2,1,1,1,2,1,1,1,1,1,2,1,1,1,1,2,1,2,2,1,1,1,2,1,1,2,2,1,1,1,2,1
"solcap_snp_c2_10693",139.29,2,2,2,1,2,2,2,1,1,1,2,1,1,1,2,2,2,2,2,1,1,2,2,1,2,2,2,2,1,2,2,1
"solcap_snp_c2_10692",139.29,2,2,2,2,2,2,2,1,2,2,2,2,1,2,2,2,2,2,2,2,2,2,2,2,2,2,2,2,2,2,2,2
"solcap_snp_c2_10691",139.29,2,2,2,2,2,2,2,2,1,2,2,2,2,2,2,2,2,2,2,2,2,2,2,2,2,2,2,2,2,2,2,2
"solcap_snp_c1_3522",140.32,1,1,1,2,1,1,1,2,2,2,1,2,2,2,1,1,1,1,1,2,2,1,1,2,1,1,1,1,2,1,1,2
"solcap_snp_c2_10690",140.32,1,1,1,1,1,1,1,1,2,1,1,1,1,1,1,1,1,1,1,1,1,1,1,1,1,1,1,1,1,1,1,1
"solcap_snp_c2_10687",140.32,1,1,1,1,1,1,1,2,1,1,1,1,2,1,1,1,1,1,1,1,1,1,1,1,1,1,1,1,1,1,1,1
"solcap_snp_c2_10685",141.77,1,1,1,2,1,1,1,2,2,2,1,2,2,2,1,1,1,1,1,2,2,1,1,2,1,1,1,1,2,1,1,2
"solcap_snp_c1_3515",141.77,2,2,2,1,2,2,2,1,1,2,2,2,1,2,2,2,2,2,2,2,2,2,2,2,2,2,2,2,2,2,2,2
"solcap_snp_c1_3514",141.89,1,1,1,2,1,1,1,2,2,1,1,1,2,1,1,1,1,1,1,1,1,1,1,1,1,1,1,1,1,1,1,1
"solcap_snp_c2_10660",142.45,1,1,1,2,1,1,1,2,2,1,1,1,2,1,1,1,1,1,1,1,1,1,1,1,1,1,1,1,1,1,1,1
"solcap_snp_c2_10658",143.76,1,1,1,1,1,2,1,1,1,2,1,2,1,2,1,1,2,1,1,2,2,1,1,2,1,1,1,2,2,1,1,2
"solcap_snp_c2_10656",144.34,1,2,2,2,1,2,2,2,2,2,1,2,2,2,2,1,2,1,1,2,2,1,1,2,2,1,1,2,2,1,1,2
"solcap_snp_c2_10626",144.76,2,2,2,1,2,2,2,1,1,1,2,1,1,2,2,2,1,2,2,1,1,2,2,1,2,2,2,1,1,2,2,1
"solcap_snp_c1_3499",145.71,1,2,2,2,1,1,2,2,1,2,1,2,2,1,2,1,1,1,1,2,2,1,1,2,2,1,1,1,2,1,1,2
"solcap_snp_c1_3495",145.75,1,1,1,2,1,1,1,2,2,1,1,1,2,1,1,1,1,1,1,1,1,1,1,1,1,1,1,1,1,1,1,1
"solcap_snp_c1_3484",147.23,2,2,2,2,2,2,2,2,2,2,2,2,2,1,2,2,1,2,2,2,2,2,2,2,2,2,2,1,2,2,2,2
"solcap_snp_c2_10566",147.37,1,2,2,2,1,1,2,2,2,2,1,2,2,2,2,1,2,1,1,2,2,1,2,2,2,1,1,2,2,1,2,2
"solcap_snp_c2_10552",148.39,2,2,2,1,2,2,2,1,1,2,2,2,1,2,2,2,2,2,2,2,2,2,1,2,2,2,2,2,2,2,1,2
"solcap_snp_c1_3462",148.39,1,1,1,1,1,1,1,2,1,1,1,1,2,1,1,1,1,1,1,1,1,1,1,1,1,1,1,1,1,1,1,1
"solcap_snp_c1_3461",148.39,2,2,2,2,2,2,2,1,2,2,2,2,1,2,2,2,2,2,2,2,2,2,2,2,2,2,2,2,2,2,2,2
